# Supplementary material
Source: PubMed Central journal article supplement (PMC3801227)
Supplement: NIHMS515163-supplement-1.pdf [file NIHMS515163-supplement-1.pdf]

# Supplemental Figure 1

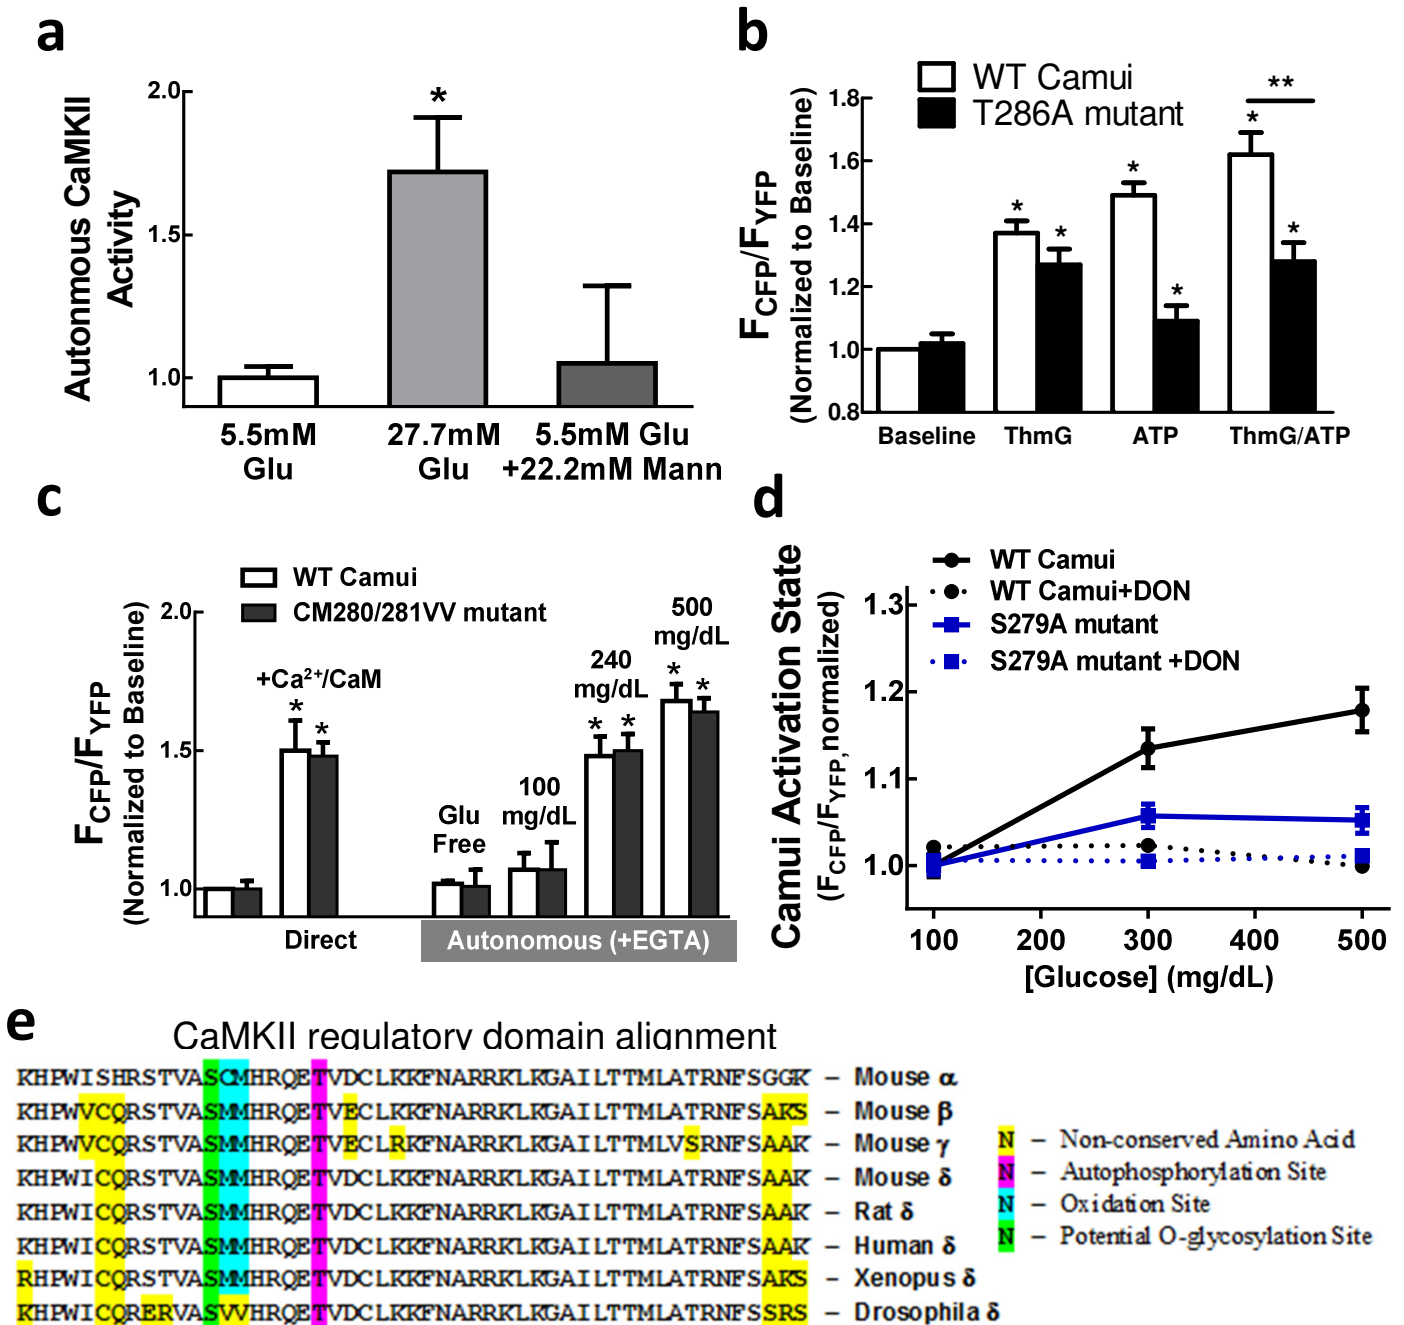

**Supplemental Figure 1 - O-GlcNAc effect is not abolished by T286A or CM280/1VV mutation and CaMKII regulatory domain contains consensus O-GlcNAc modification sites.** **a**, Increased [glucose], but not osmolarity matched [mannitol], activates CaMKII in HEK cells (n=9). **b**, O-GlcNAc dependent CaMKII activation is reduced but still present in T286A mutant Camui (n=9) **c**, Glucose dependent CaMKII activation is preserved in CM280/281VV mutant Camui expressed in HEK cell lysates (n=9). **d**, Activation of Camui by increased [glucose] is blunted in the S279A mutant and ablated entirely by DON. (n values: WT = 100, WT+DON = 72, S279A = 57, S279A+DON = 44 cells) **e**, These sites are conserved in all known isoforms of CaMKII and in a wide variety of mammalian species. Data are mean $\pm$ s.e.m. \* indicates p<0.05, \*\* indicates p<0.01 vs. control.

## Supplemental Figure 2

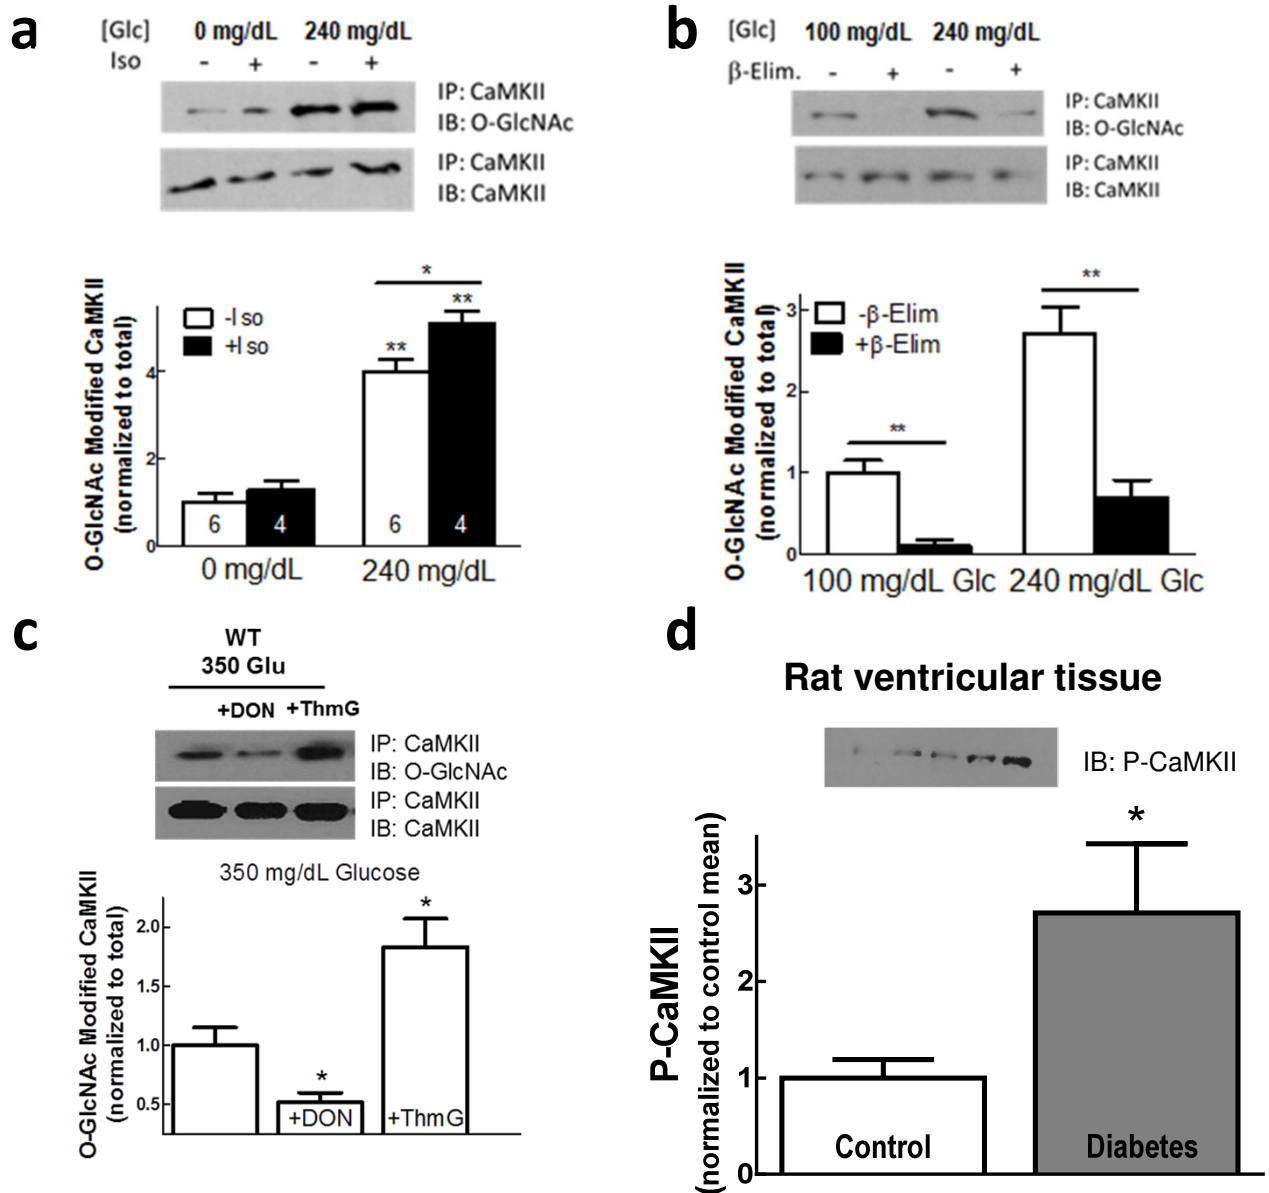

**Supplemental Figure 2 - O-GlcNAc modification of CaMKII is enhanced in hyperglycemic conditions.** **a**, Immunoblot with an O-GlcNAc specific antibody shows O-GlcNAc modification of CaMKII is inducible by increased glucose availability and is enhanced by Iso treatment. (n values indicated) **b**, O-GlcNAc modification of CaMKII is reversed by  $\beta$ -elimination reaction prior to immunoblot. **c**, O-GlcNAc modification of CaMKII is ablated by DON and enhanced by Thm-G. **d**, Autophosphorylation of cardiac CaMKII is significantly increased in a rat model of diabetes. n=3 for all immunoblots except where indicated. Data are mean $\pm$ s.e.m. \* indicates p<0.05, \*\* indicates p<0.01 vs. control.

# Supplemental Figure 3

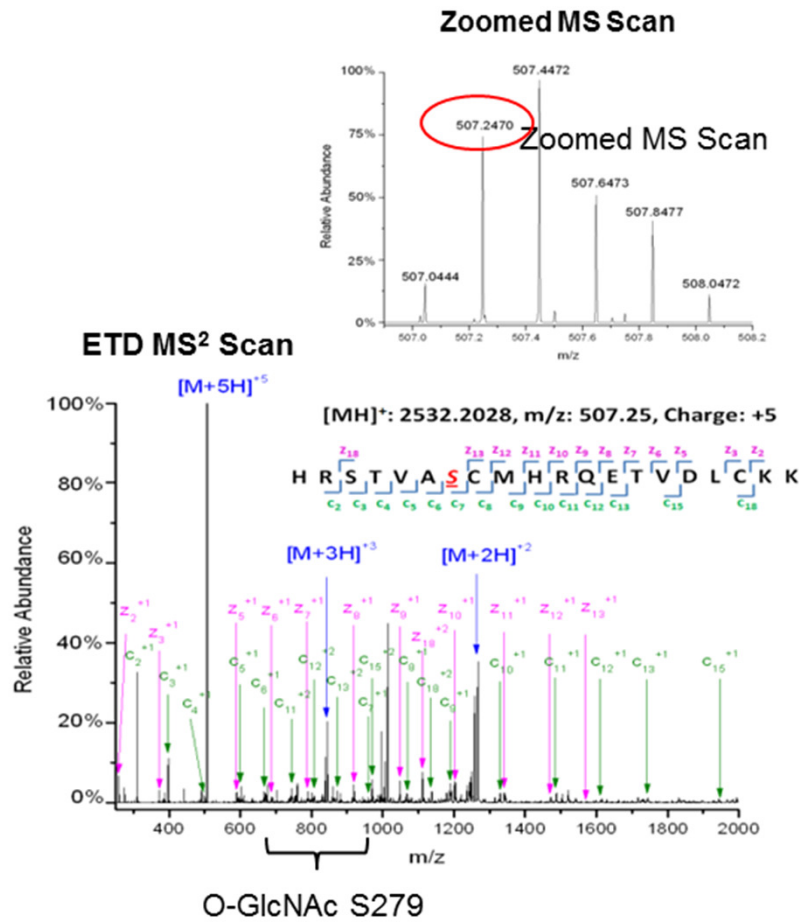

**Supplemental Figure 3 – ETD-MS analysis confirms O-GlcNAc modification at S279A.** A synthetic peptide encoding the regulatory domain of CaMKII was subjected to in vitro O-GlcNAc labeling followed by ETD-MS analysis. Examination of the 507.25 *m/z* peptide fragment (upper right inset) indicates the presence of an O-GlcNAc modification at S279 (*c6* to *c7* fragmentation).

## Supplemental Figure 4

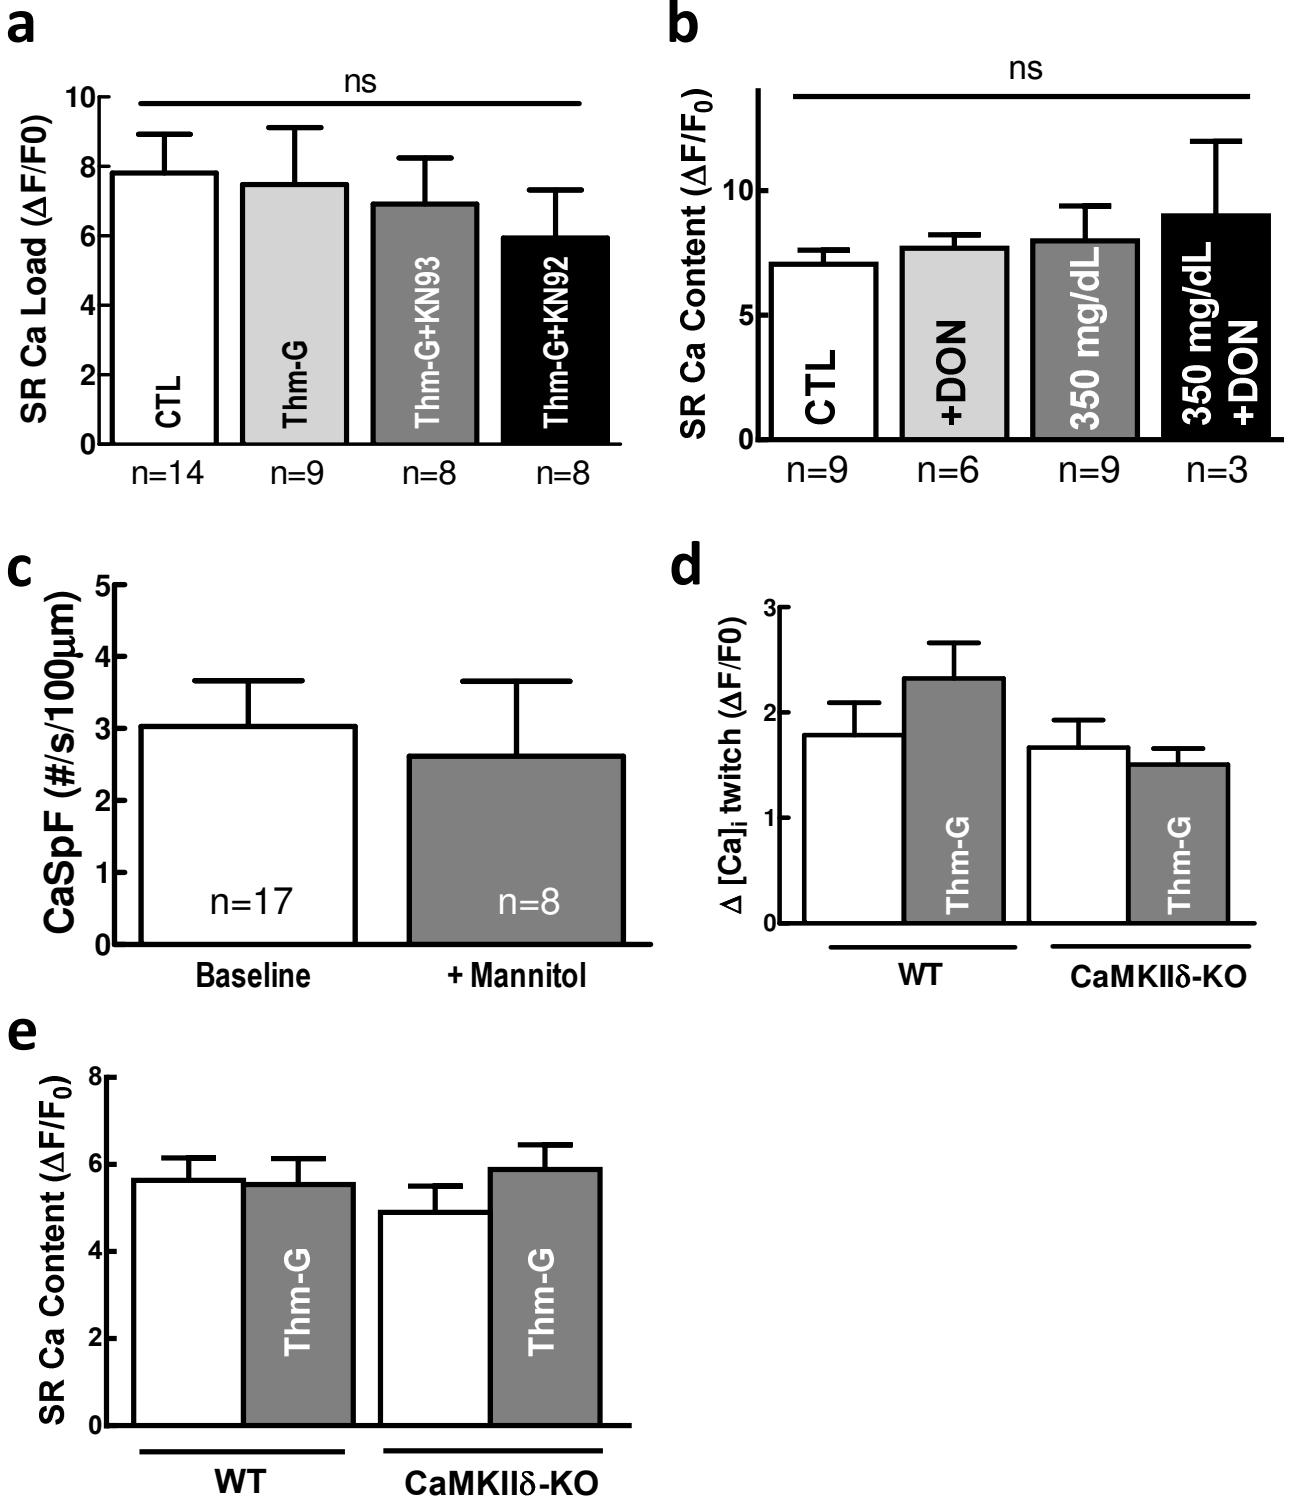

**Supplemental Figure 4** - SR content is unaffected by Thm-G (a) or DON (b) in isolated rat myocytes (n values indicated). c, Mannitol does not enhance Ca<sup>2+</sup> spark frequency in isolated rat myocytes. Ca<sup>2+</sup> transient amplitude (d, n=13) and SR content (e, n=13) content are unaffected by Thm-G treatment in isolated myocytes from wild type (WT) or CaMKII $\delta$  knockout mice. Data are mean $\pm$ s.e.m. ns indicates no significant difference.

## Supplemental Figure 5

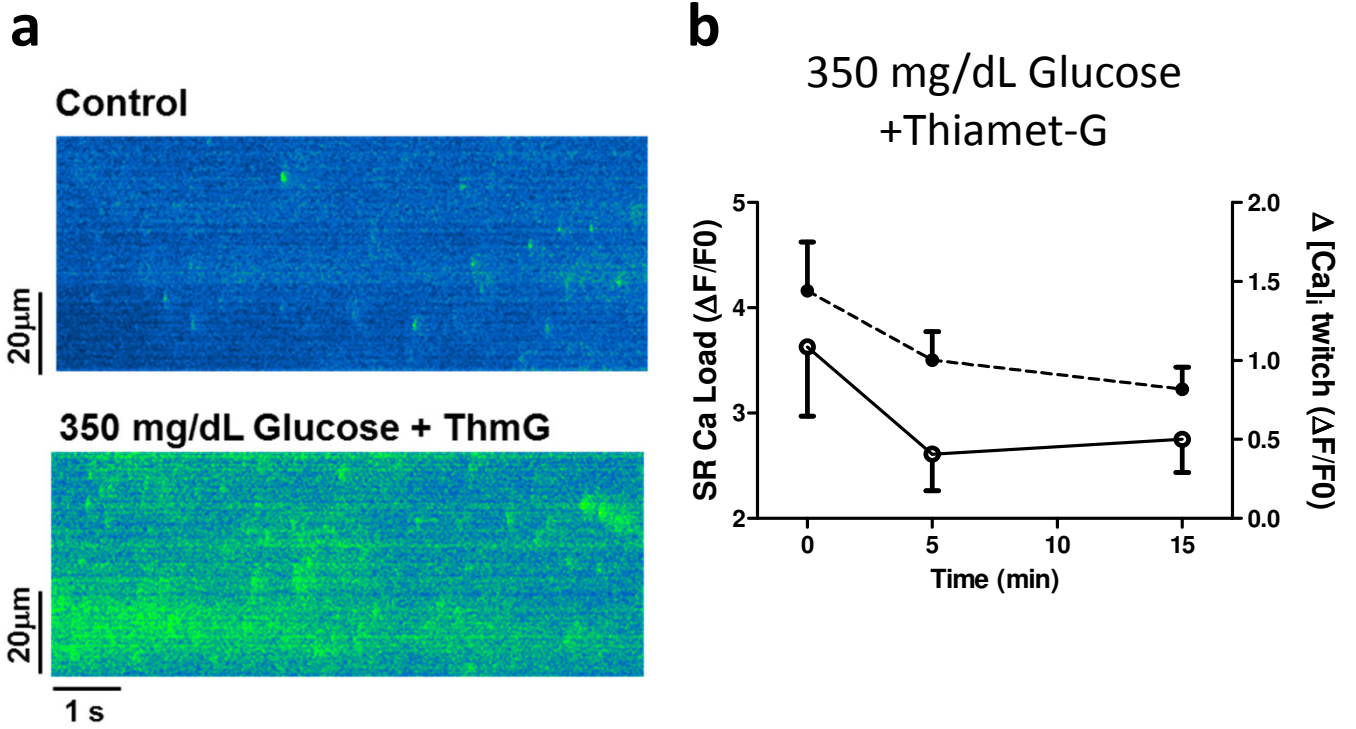

**Supplemental Figure 5** - Simultaneous treatment with 350 mg/dL glucose and ThmG greatly enhances  $Ca^{2+}$  spark frequency **a**, and SR  $Ca^{2+}$  depletion **b**, in isolated rat myocytes ( $n=6$ ). Data are mean  $\pm$  s.e.m.

## Supplemental Figure 6

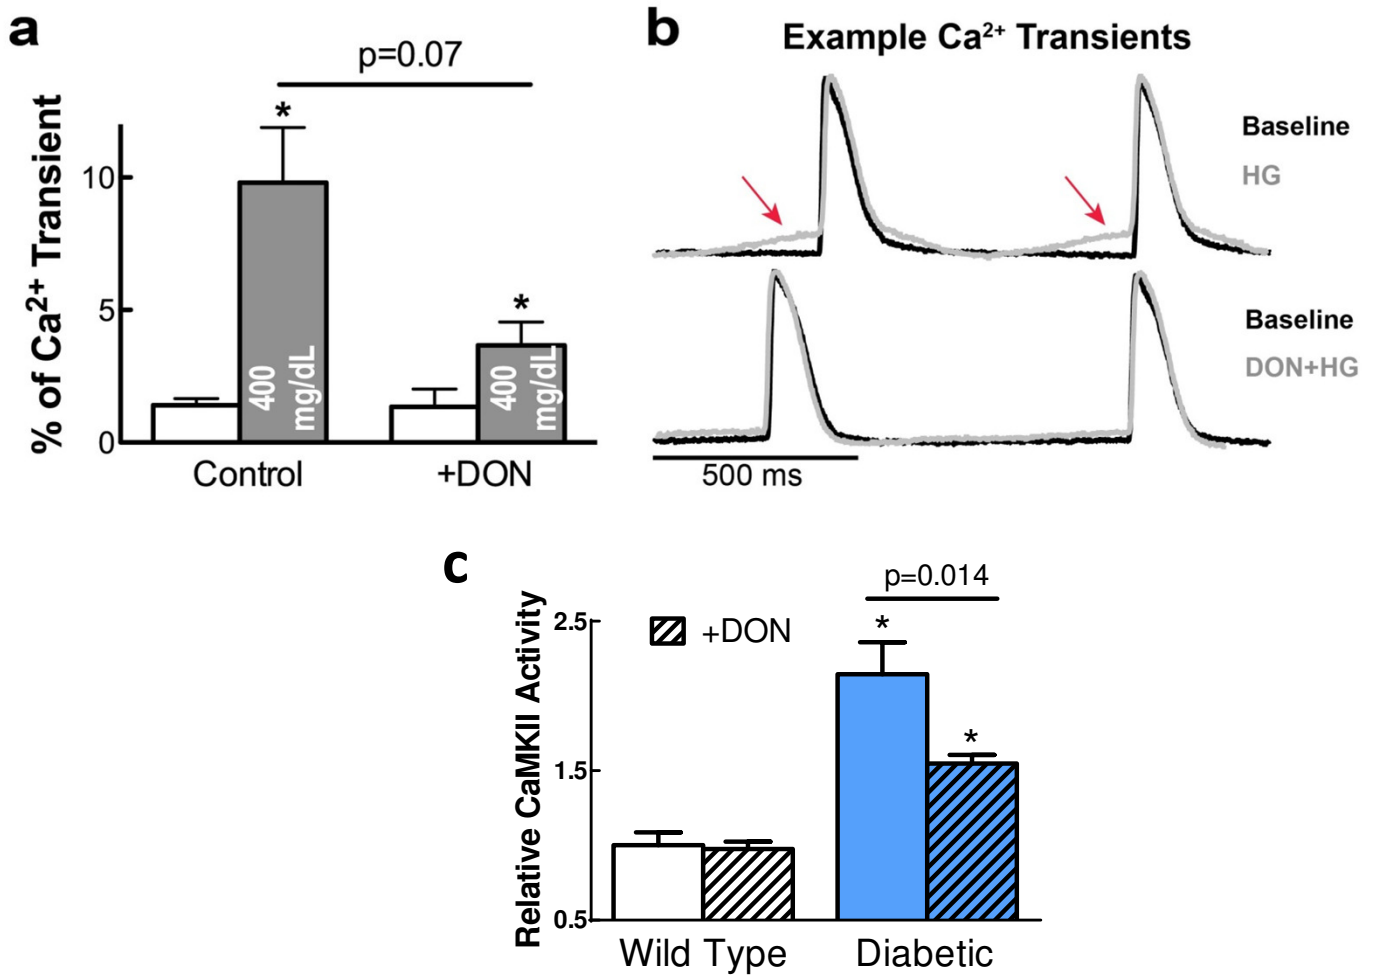

**Supplemental Figure 6 - Diastolic  $[Ca^{2+}]_i$  elevation under high glucose (HG) is suppressed by pre-treatment with 50 mM DON.** **a**, Average diastolic  $Ca^{2+}$  elevation at baseline and following treatment with either HG or DON+HG.  $Ca^{2+}$  elevation was measured as the percent increase in the diastolic  $Ca^{2+}$  signal relative to the amplitude of the following  $Ca^{2+}$  transient. (n=3) **b**, Example  $Ca^{2+}$  transients during baseline conditions (black) and following treatment with either HG or DON+HG (gray). Minimal diastolic  $Ca^{2+}$  elevation occurs following pre-treatment with DON. n=3-4 rats for all data points. **c**, CaMKII activity is enhanced in heart lysate from diabetic rats (n=3), and this effect is blunted by treatment with DON. Data are mean $\pm$ s.e.m. \* indicates  $p < 0.05$  vs. control.
